# Supplementary material
Source: MDPI journal article supplement (https://www.mdpi.com/2227-9717/10/11/2227)
Supplement: s1 [file s1]

## Supporting Information

**Table S1.** Variation of solution pH in the process of PCA degradation by PDS catalyzed with  $\text{MnFe}_2\text{O}_4$

| t (min) | 0     | 30         | 60         | 90         | 120        | 180        | 240        |
|---------|-------|------------|------------|------------|------------|------------|------------|
| pH = 3  | 3.00  | 3.72±0.01  | 3.81±0.01  | 3.88±0.01  | 3.91±0.01  | 3.94±0.01  | 3.93±0.01  |
| pH = 5  | 5.00  | 3.94±0.01  | 3.95±0.01  | 4.00±0.01  | 4.04±0.01  | 4.08±0.01  | 4.13±0.01  |
| pH = 7  | 7.00  | 4.00±0.01  | 3.99±0.01  | 4.04±0.01  | 4.08±0.01  | 4.15±0.01  | 4.16±0.01  |
| pH = 9  | 9.00  | 3.99±0.01  | 3.97±0.01  | 3.99±0.01  | 4.03±0.01  | 4.13±0.01  | 4.14±0.01  |
| pH = 11 | 11.00 | 10.42±0.01 | 10.38±0.01 | 10.40±0.01 | 10.35±0.01 | 10.32±0.10 | 10.25±0.01 |

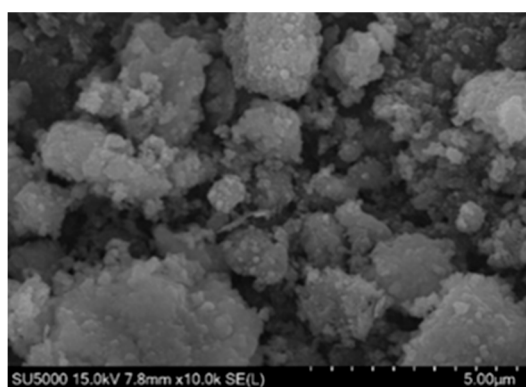

(a)

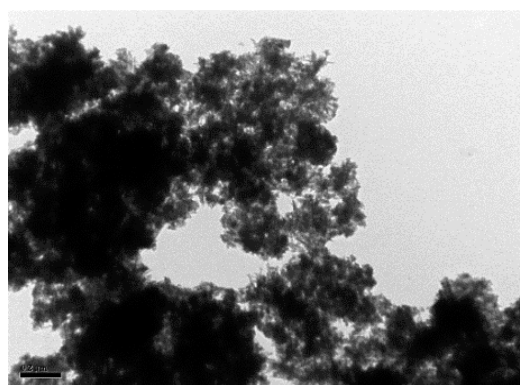

(b)

**Figure S1.** SEM image (a) and TEM image (b) of  $\text{MnFe}_2\text{O}_4$  material

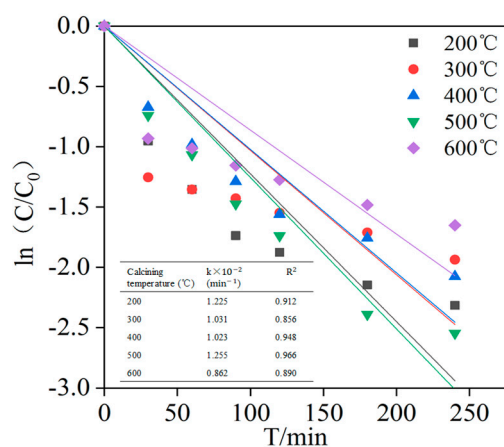

**Figure S2.** The quasi-first-order dynamic model of PCA removal at different calcination temperature in the  $\text{MnFe}_2\text{O}_4/\text{PDS}$  systems

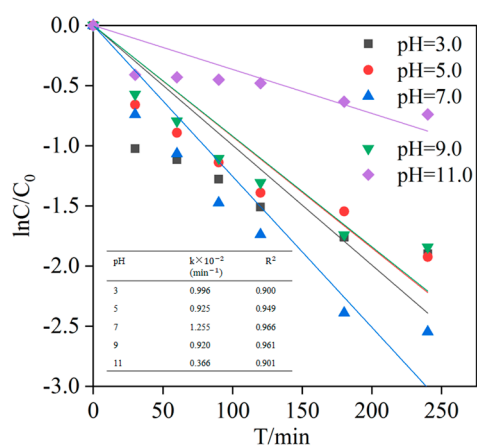

**Figure S3.** The quasi-first-order dynamic model of PCA removal at different pH in the  $\text{MnFe}_2\text{O}_4/\text{PDS}$  systems

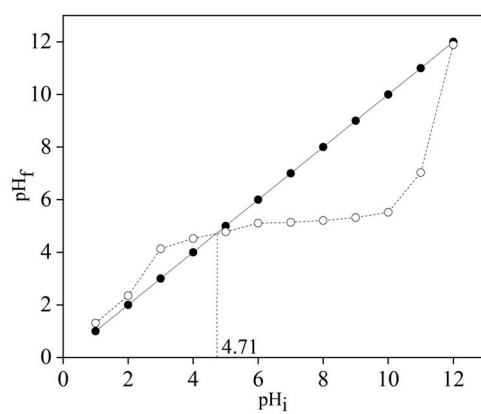

**Figure S4.**  $\text{pH}_{\text{pzc}}$  of  $\text{MnFe}_2\text{O}_4$ ,  $500^\circ\text{C}$

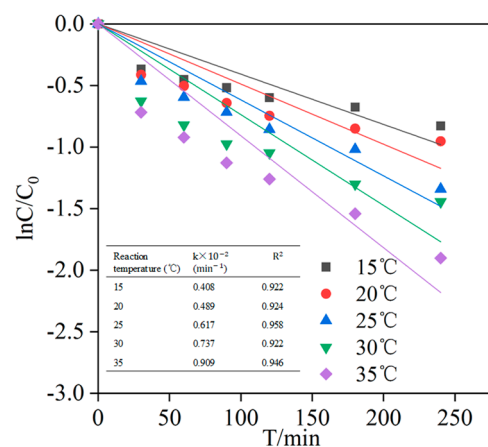

**Figure S5.** The quasi-first-order dynamic model of PCA removal at different temperature in the  $\text{MnFe}_2\text{O}_4/\text{PDS}$  systems

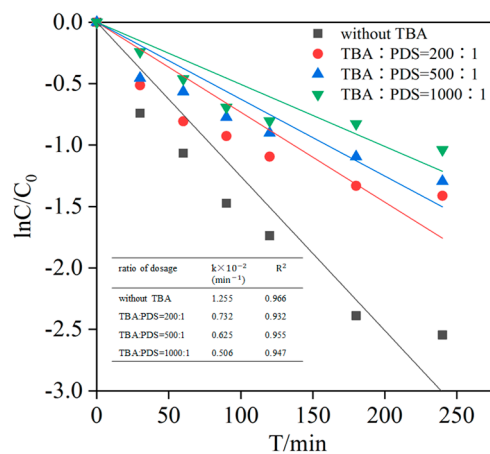

**Figure S6.** The quasi-first-order dynamic model of PCA removal by adding TBA in the  $\text{MnFe}_2\text{O}_4/\text{PDS}$  systems

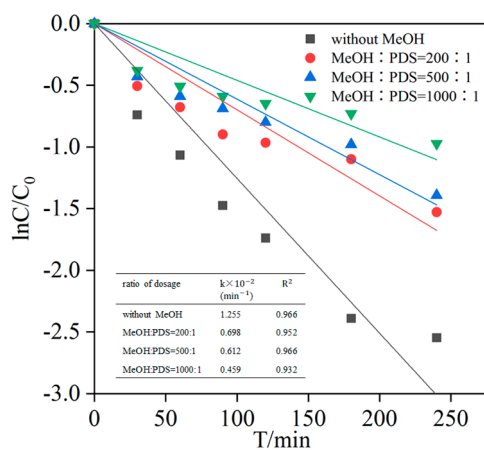

**Figure.S7.** The quasi-first-order dynamic model of PCA removal at by adding MeOH in the  $\text{MnFe}_2\text{O}_4/\text{PDS}$  systems

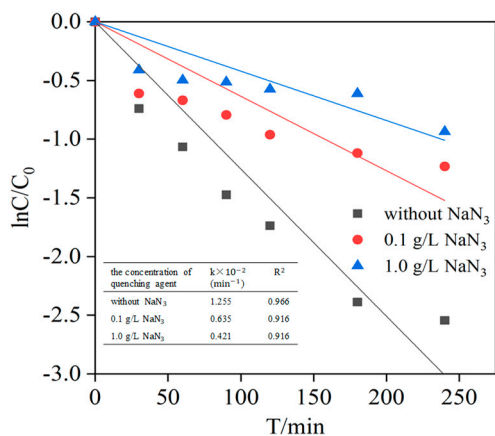

**Figure.S8.** The quasi-first-order dynamic model of PCA removal by adding  $\text{NaN}_3$  in the  $\text{MnFe}_2\text{O}_4/\text{PDS}$  systems
